# Supplementary material for: Do Rutin and Quercetin Retain Their Structure and Radical Scavenging Activity after Exposure to Radiation?
Source: MDPI journal article supplement (doi:10.3390/molecules28062713), 2023-03-17
Supplement: s1 [file s1]

*Supplementary materials*

# Do Rutin and Quercetin Retain Their Structure and Radical Scavenging Activity after Exposure to Radiation?

Natalia Rosiak <sup>1</sup>, Judyta Cielecka-Piontek <sup>1</sup>, Robert Skibiński <sup>2</sup>, Kornelia Lewandowska <sup>3</sup>, Waldemar Bednarski <sup>3</sup> and Przemysław Zalewski <sup>1,\*</sup>

<sup>1</sup> Department of Pharmacognosy, Poznan University of Medical Sciences, Rokietnicka 3, 60-806 Poznan, Poland

<sup>2</sup> Department of Medicinal Chemistry, Medical University of Lublin, Jaczewskiego 4, 20-090 Lublin, Poland

<sup>3</sup> Institute of Molecular Physics, Polish Academy of Sciences, Smoluchowskiego 17, 60-179 Poznań, Poland

\* Correspondence: pzalewski@ump.edu.pl; Tel.: +48-(61)-854-67-10

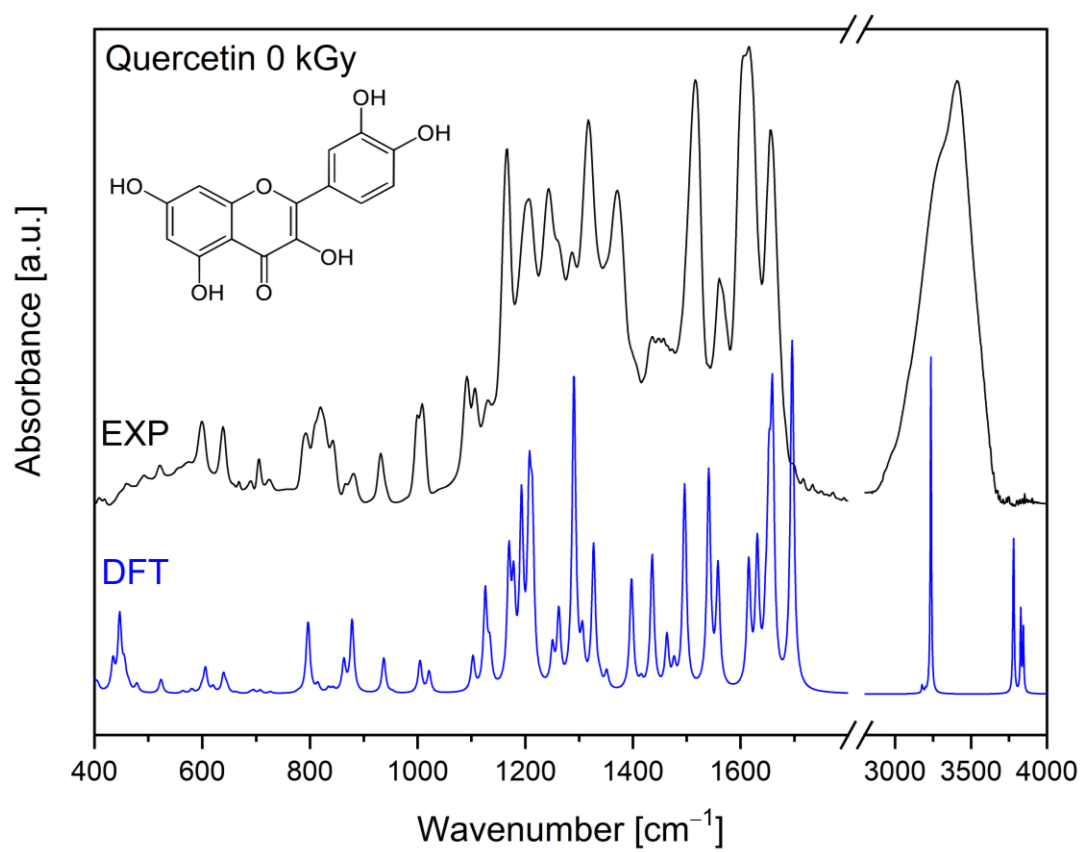

**Figure S1.** Theoretical (DFT, blue line) and experimental (EXP, black line) absorption spectra in IR range of quercetin.

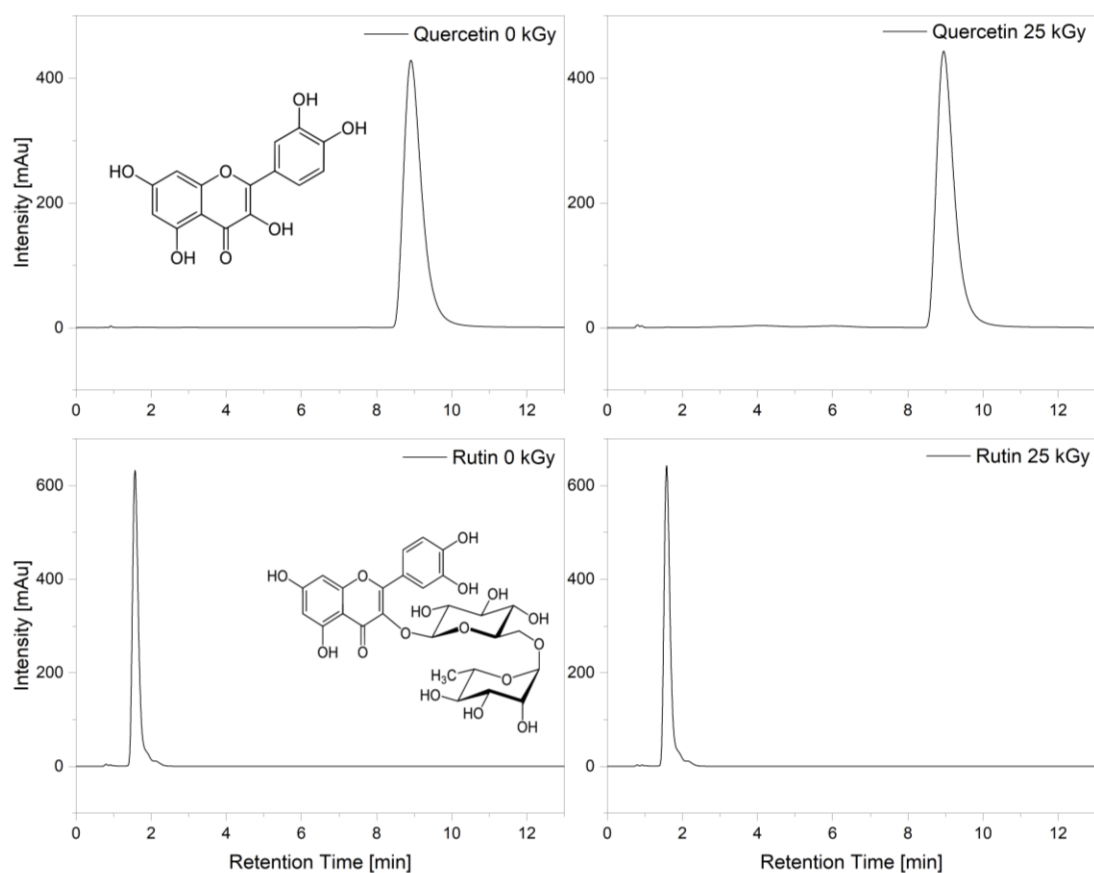

**Figure S2.** The HPLC analysis of non-irradiated quercetin (Quercetin 0 kGy), non-irradiated rutin (Rutin 0 kGy), irradiated quercetin (Quercetin 25 kGy), and irradiated rutin (Rutin 25 kGy).

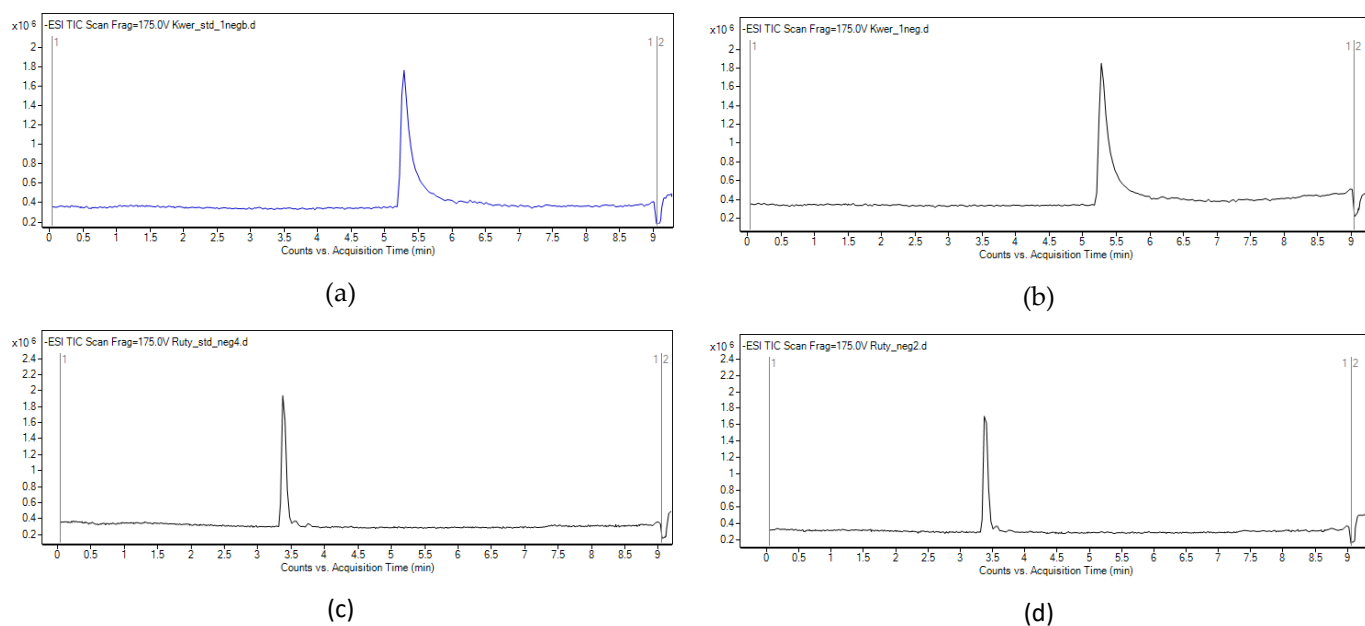

**Figure S3.** The LC-MS analysis: non-irradiated quercetin (a); irradiated quercetin (25 kGy) (b); non-irradiated rutin (c); irradiated rutin (25 kGy) (d).

**Table S1.** Selected experimental and theoretical modes (in cm<sup>-1</sup>) characteristic vibronic features of quercetin

| Calculation (cm <sup>-1</sup> ) | Experimental (cm <sup>-1</sup> ) | Band assignment                                                                             |
|---------------------------------|----------------------------------|---------------------------------------------------------------------------------------------|
| 600                             | 598                              | Def. trihydroxychromenone group                                                             |
| 640                             | 637                              | Def. dihydroxyphenyl group                                                                  |
| 708                             | 706                              | Def. all molecule                                                                           |
| 798                             | 790                              | C–H oop at trihydroxychromenone group + breathing dihydroxyphenyl                           |
| 815                             | 820                              | C–H oop at trihydroxychromenone group                                                       |
| 879                             | 880                              | O–H oop at trihydroxychromenone group                                                       |
| 938                             | 931                              | C–C–C b in dihydroxyphenyl group + rocking trihydroxychromenone group                       |
| 1005                            | 999                              | Def. trihydroxychromenone group + C–H r                                                     |
| 1022                            | 1005                             | C–H r                                                                                       |
| 1103                            | 1092                             | C–O s + C–O–H b at trihydroxychromenone group                                               |
| 1128                            | 1108                             | C–H r + C–O–H b at dihydroxyphenyl group                                                    |
| 1170                            | 1166                             | C–H r + O–H r                                                                               |
| 1193                            | 1206                             | C–O s in COH in trihydroxychromenone group + O–H r + C–H r + C–O s                          |
| 1208                            | 1244                             | C–H r + C–O s                                                                               |
| 1251                            | 1262                             | C–O s in dihydroxyphenyl group + C–O–H b in dihydroxyphenyl group + C–C s + C–O s + C–O–H b |
| 1263                            | 1288                             | O–H r                                                                                       |
| 1291                            | 1317                             | C–C s + C–O s in dihydroxyphenyl group + C–O–H b + C–H r                                    |
| 1328                            | 1371                             | C–C s between dihydroxyphenyl and trihydroxychromenone groups + C–O–H b + C–H r             |
| 1464                            | 1434                             | C–O s + C–C s + C–O–H b + C=C s in dihydroxyphenyl group + C–H r                            |
| 1497                            | 1460                             | C–C s + C–O s + C–H r + C–O–H b                                                             |
| 1542                            | 1517                             | C–C s + C–O–H b + C–H r + C–O s in dihydroxyphenyl group                                    |
| 1616                            | 1562                             | C=C s + C–C s + C–O–H b                                                                     |
| 1660                            | 1616                             | C=O s + C–C s + C=C s + C–O s in dihydroxyphenyl group + C–H r                              |
| 1697                            | 1656                             | C=O s + C–O–H b + C=C s                                                                     |
| 3221                            | 3274                             | C–H s                                                                                       |
| 3778                            | 3406                             | O–H s                                                                                       |

Legend: b-bending, def.-deformation, oop-out of plane, r-rocking, s-stretching

**Table S2.** Results of HPLC-MS analysis

| Comp. No. | Name      | Retention time | Measured mass (m/z) | Theoretical mass (m/z) | Mass error (ppm) | Molecular ion formula [M-H <sup>-</sup> ]       | MS/MS fragmentation ions (m/z)                           | MS/MS fragment formula                                                                                                                                                                                                                            |
|-----------|-----------|----------------|---------------------|------------------------|------------------|-------------------------------------------------|----------------------------------------------------------|---------------------------------------------------------------------------------------------------------------------------------------------------------------------------------------------------------------------------------------------------|
| Quercetin |           |                |                     |                        |                  |                                                 |                                                          |                                                                                                                                                                                                                                                   |
| 1         | Quercetin | 5.3            | 301.0361            | 301.0354               | 2.49             | C <sub>15</sub> H <sub>9</sub> O <sub>7</sub>   | 178.9983<br>151.0036<br>121.0292<br>107.0139             | C <sub>8</sub> H <sub>3</sub> O <sub>5</sub><br>C <sub>7</sub> H <sub>3</sub> O <sub>4</sub><br>C <sub>7</sub> H <sub>5</sub> O <sub>2</sub><br>C <sub>6</sub> H <sub>3</sub> O <sub>2</sub>                                                      |
| Rutin     |           |                |                     |                        |                  |                                                 |                                                          |                                                                                                                                                                                                                                                   |
| Comp. No. | Name      | Retention time | Measured mass (m/z) | Theoretical mass (m/z) | Mass error (ppm) | Molecular ion formula [M-H <sup>-</sup> ]       | MS/MS fragmentation ions (m/z)                           | MS/MS fragment formula                                                                                                                                                                                                                            |
| 1         | Rutin     | 3.4            | 609.1462            | 609.1461               | 0.2              | C <sub>27</sub> H <sub>29</sub> O <sub>16</sub> | 343.0455<br>300.0279<br>271.0261<br>255.0310<br>151.0010 | C <sub>17</sub> H <sub>11</sub> O <sub>8</sub><br>C <sub>15</sub> H <sub>9</sub> O <sub>7</sub><br>C <sub>14</sub> H <sub>7</sub> O <sub>6</sub><br>C <sub>14</sub> H <sub>7</sub> O <sub>5</sub><br>C <sub>7</sub> H <sub>3</sub> O <sub>4</sub> |
| 2         | hyperin   | 3.54           | 463.0881            | 463.0882               | 0.2              | C <sub>21</sub> H <sub>19</sub> O <sub>12</sub> | 300.0268<br>271.0247<br>255.0291<br>243.0296<br>151.0003 | C <sub>15</sub> H <sub>9</sub> O <sub>8</sub><br>C <sub>14</sub> H <sub>7</sub> O <sub>6</sub><br>C <sub>14</sub> H <sub>7</sub> O <sub>5</sub><br>C <sub>13</sub> H <sub>7</sub> O <sub>5</sub><br>C <sub>7</sub> H <sub>3</sub> O <sub>4</sub>  |
